# Supplementary material for: A Single‐Nucleotide Mutation in a GLUTAMATE RECEPTOR‐LIKE Gene Confers Resistance to Fusarium Wilt in Gossypium hirsutum
Source: PubMed Central journal article supplement (PMC8025038; doi:10.1002/advs.202002723), 2021-02-19
Supplement: ADVS-8-2002723-s001.pdf [file ADVS-8-2002723-s001.pdf]

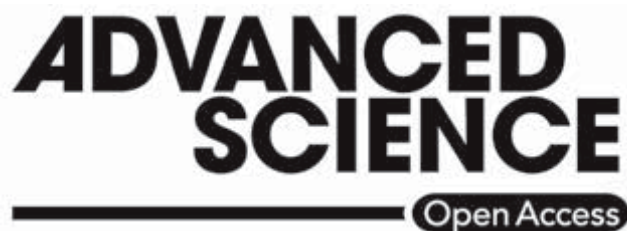

## Supporting Information

for *Adv. Sci.*, DOI: 10.1002/advs.202002723

### **A single-nucleotide mutation in a GLUTAMATE RECEPTOR-LIKE gene confers resistance to Fusarium wilt in *Gossypium hirsutum***

*Shiming Liu, Xiaojun Zhang, Shenghua Xiao, Jun Ma, Weijun Shi, Tao Qin, Hui Xi, Xinhui Nie, Chunyuan You, Zheng Xu, Tianyi Wang, Yujing Wang, Zhennan Zhang, Jianying Li, Jie Kong, Alifu•Aierxi, Yu Yu, Keith Lindsey, Steven J. Klosterman, Xianlong Zhang and Longfu Zhu\**

## Supporting Information

### **A single-nucleotide mutation in a GLUTAMATE RECEPTOR-LIKE gene confers resistance to *Fusarium* wilt in *Gossypium hirsutum***

*Shiming Liu, Xiaojun Zhang, Shenghua Xiao, Jun Ma, Weijun Shi, Tao Qin, Hui Xi, Xinhui Nie, Chunyuan You, Zheng Xu, Tianyi Wang, Yujing Wang, Zhennan Zhang, Jianying Li, Jie Kong, Alifu•Aierxi, Yu Yu, Keith Lindsey, Steven J. Klosterman, Xianlong Zhang and Longfu Zhu\**

#### Supplementary Figures and Tables

#### Supplementary Figure 1

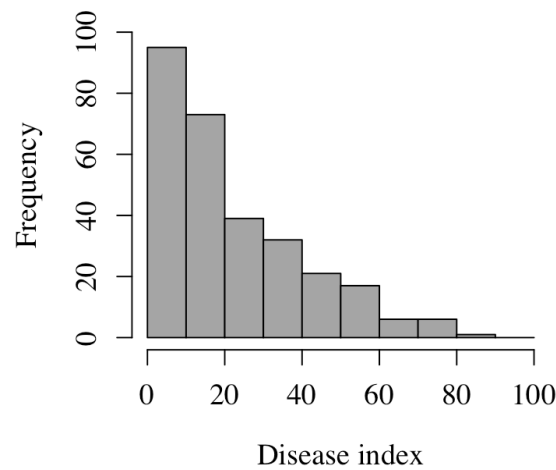

**Supplementary Figure 1.** Frequency distribution histogram of disease index of the 290 Upland cotton varieties.

## Supplementary Figure 2

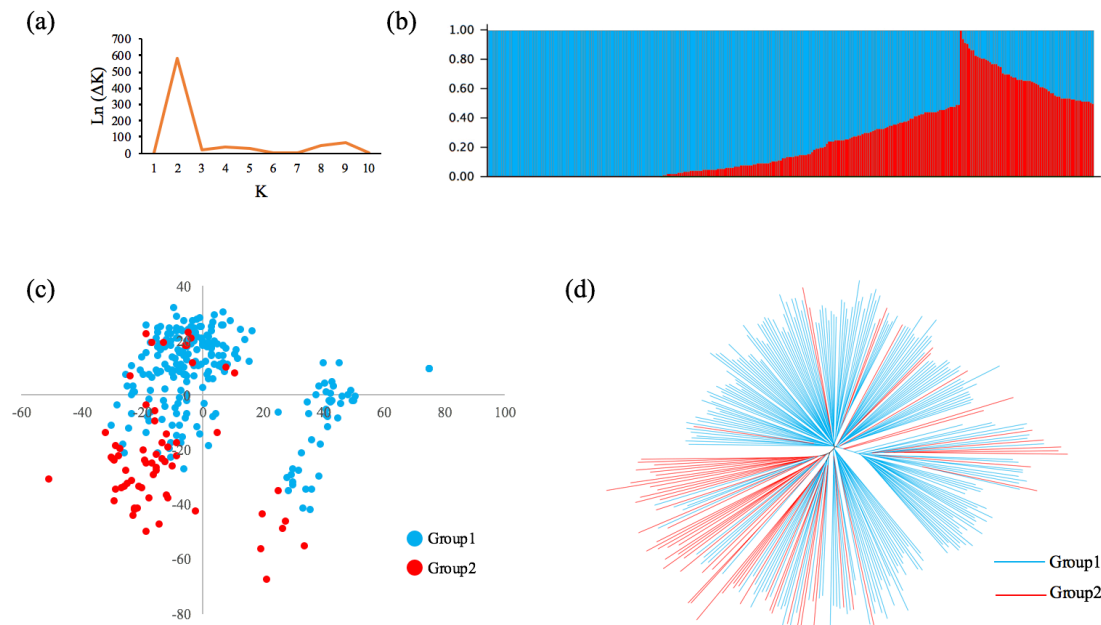

**Supplementary Figure 2.** Population structure of the 290 cotton accessions. **(a)** Corresponding  $\ln(\Delta K)$  values when  $K$  from 1 to 10. **(b)** When  $K=2$ , the population contained 290 cotton accessions was divided into two subpopulations. **(c)** Principal component analysis (PCA) of the population. **(d)** Neighbor-joining tree of the 290 cotton accessions.

### Supplementary Figure 3

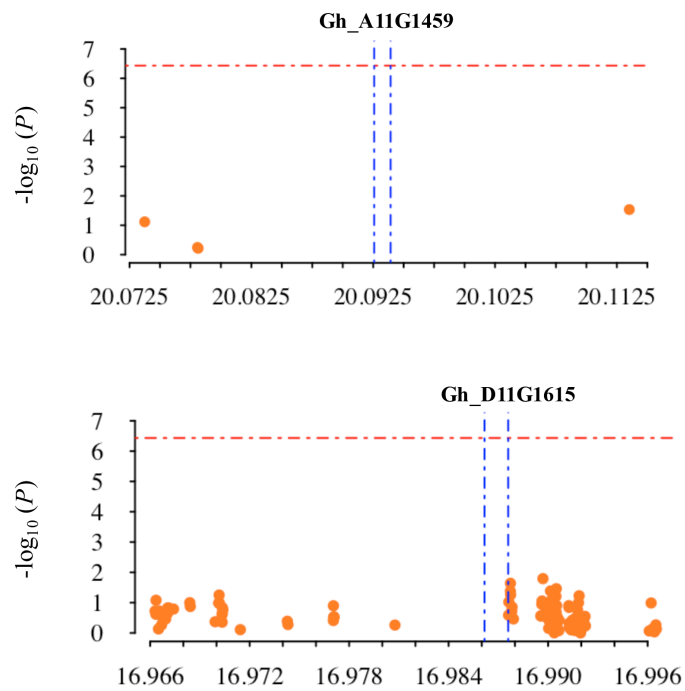

**Supplementary Figure 3.** The nucleotide variations nearby the *GaGSTF9* homologue in *G. hirsutum* are not associated with Fusarium wilt resistance in Upland cotton. *Gh\_A11G1459* and *Gh\_D11G1615* are the homologous genes of *GaGSTF9* in A subgenome and D subgenome, respectively. Blue dashed line represents the genome region of the gene. Red dashed line represents the Bonferroni-adjusted significance threshold ( $-\log_{10}(P) = 6.43$ ).

## Supplementary Figure 4

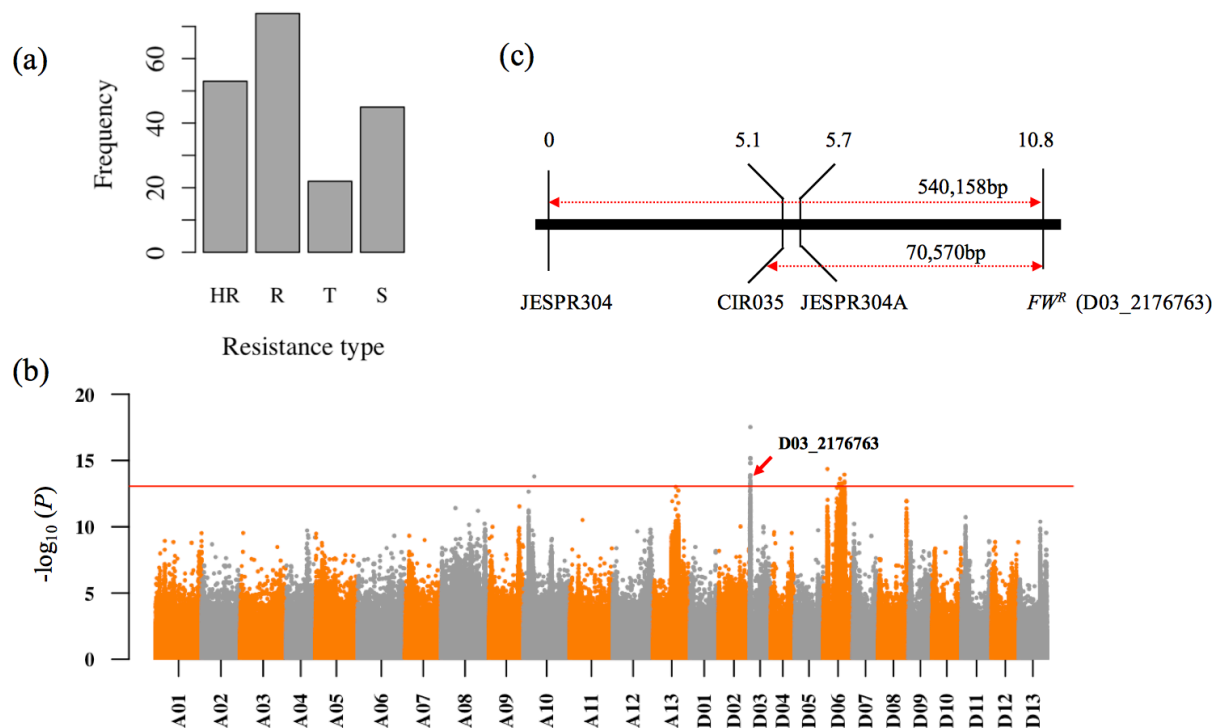

**Supplementary Figure 4.** GWAS analysis for Fusarium wilt resistance in a population contained 194 Upland cotton cultivars. **(a)** Frequency distribution histogram of disease index of the population. **(b)** Manhattan plot for disease index. The red solid line represents the significance threshold ( $-\log_{10}(P) = 13.05$ ). The significant SNP (D03\_2176763) was marked by arrowhead. **(c)** The distance between  $FW^R$ -linked SSR markers and D03\_2176763 on chromosome D03. Position of  $FW^R$  and SSR markers was determined according to Wang.<sup>[2]</sup> These two SSR markers were mapped to the ‘TM-1’ reference genome recently assembled by PacBio RSII.<sup>[19]</sup> The sequence of JESPR304 matches with a genomic region from 1,707,836 bp to 1,707,629 bp, and CIR035 from 2,177,424 bp to 2,177,088 bp on chromosome D03. The SNP D03\_2176763 is at the 2,247,994 bp-position of on chromosome D03 in the ‘TM-1’ genome.

**Supplementary Figure 5**

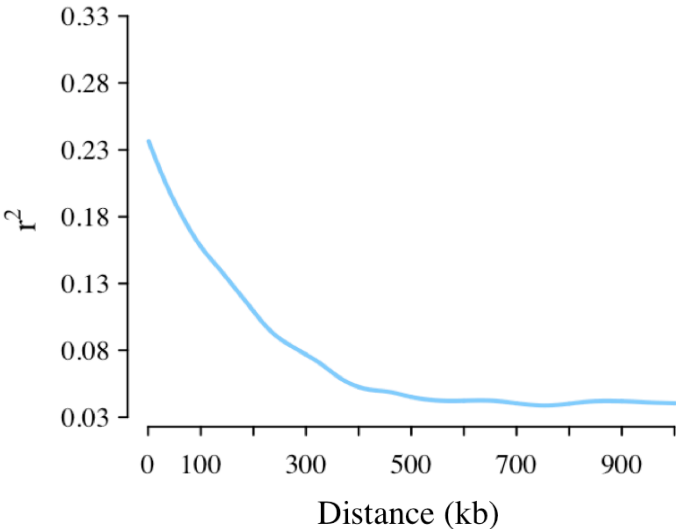

**Supplementary Figure 5.** Linkage disequilibrium (LD) decay in D03 chromosome. When  $r^2$  is half of the maximum, the corresponding physical distance is set as the extent of LD (200 kb).



## Supplementary Figure 7

GhGLR4.8  
 GluA2  
 ATGLR1.1  
 ATGLR1.2  
 ATGLR1.3  
 ATGLR1.4  
 ATGLR2.1  
 ATGLR2.2  
 ATGLR2.3  
 ATGLR2.4  
 ATGLR2.5  
 ATGLR2.6  
 ATGLR2.7  
 ATGLR2.8  
 ATGLR2.9  
 ATGLR3.1  
 ATGLR3.2  
 ATGLR3.3  
 ATGLR3.4  
 ATGLR3.5  
 ATGLR3.6  
 ATGLR3.7

GhGLR4.8  
 GluA2  
 ATGLR1.1  
 ATGLR1.2  
 ATGLR1.3  
 ATGLR1.4  
 ATGLR2.1  
 ATGLR2.2  
 ATGLR2.3  
 ATGLR2.4  
 ATGLR2.5  
 ATGLR2.6  
 ATGLR2.7  
 ATGLR2.8  
 ATGLR2.9  
 ATGLR3.1  
 ATGLR3.2  
 ATGLR3.3  
 ATGLR3.4  
 ATGLR3.5  
 ATGLR3.6  
 ATGLR3.7

GhGLR4.8  
 GluA2  
 ATGLR1.1  
 ATGLR1.2  
 ATGLR1.3  
 ATGLR1.4  
 ATGLR2.1  
 ATGLR2.2  
 ATGLR2.3  
 ATGLR2.4  
 ATGLR2.5  
 ATGLR2.6  
 ATGLR2.7  
 ATGLR2.8  
 ATGLR2.9  
 ATGLR3.1  
 ATGLR3.2  
 ATGLR3.3  
 ATGLR3.4  
 ATGLR3.5  
 ATGLR3.6  
 ATGLR3.7



GhGLR4.8  
 GluA2  
 ATGLR1.1  
 ATGLR1.2  
 ATGLR1.3  
 ATGLR1.4  
 ATGLR2.1  
 ATGLR2.2  
 ATGLR2.3  
 ATGLR2.4  
 ATGLR2.5  
 ATGLR2.6  
 ATGLR2.7  
 ATGLR2.8  
 ATGLR2.9  
 ATGLR3.1  
 ATGLR3.2  
 ATGLR3.3  
 ATGLR3.4  
 ATGLR3.5  
 ATGLR3.6  
 ATGLR3.7

1 10 20 30 40 50  
 GhGLR4.8  
 GluA2  
 ATGLR1.1  
 ATGLR1.2  
 ATGLR1.3  
 ATGLR1.4  
 ATGLR2.1  
 ATGLR2.2  
 ATGLR2.3  
 ATGLR2.4  
 ATGLR2.5  
 ATGLR2.6  
 ATGLR2.7  
 ATGLR2.8  
 ATGLR2.9  
 ATGLR3.1  
 ATGLR3.2  
 ATGLR3.3  
 ATGLR3.4  
 ATGLR3.5  
 ATGLR3.6  
 ATGLR3.7

SNP1

60 70 80 90 100  
 GhGLR4.8  
 GluA2  
 ATGLR1.1  
 ATGLR1.2  
 ATGLR1.3  
 ATGLR1.4  
 ATGLR2.1  
 ATGLR2.2  
 ATGLR2.3  
 ATGLR2.4  
 ATGLR2.5  
 ATGLR2.6  
 ATGLR2.7  
 ATGLR2.8  
 ATGLR2.9  
 ATGLR3.1  
 ATGLR3.2  
 ATGLR3.3  
 ATGLR3.4  
 ATGLR3.5  
 ATGLR3.6  
 ATGLR3.7

|          | 110                                                                                                                     | 120 | 130 |
|----------|-------------------------------------------------------------------------------------------------------------------------|-----|-----|
| GhGLR4.8 | T R R A K A N V L C A L P A I D K A T M G N E S S T S . . . . . Y M S R H M Y E I                                       |     |     |
| GluA2    | S A L T Y D A V Q V M T E A F R N L R K Q R I E I S R R G N . . . . . A G D C L A N P A V P W G Q G V E I E R A         |     |     |
| ATGLR1.1 | G L R A H D I A C I L A N A V E K F S V S G K V E A S S N . . . . . V S A D L L D T I                                   |     |     |
| ATGLR1.2 | G V W A H D V A W S L A S A A E V T R M P T V T S . . . . . T L L E A I                                                 |     |     |
| ATGLR1.3 | G I W A H D I A F A L A R A A E V I R M P N V T S . . . . . T L L E E I                                                 |     |     |
| ATGLR1.4 | S I W A H D I A W S L A R A A E V A K L P G L S V Y . . . . . D L L E A I                                               |     |     |
| ATGLR2.1 | G L W A Y D A T T A L A L A I E E A G . . T S N L T F V K . . . M D A K R N V S E L Q G L G V S Q Y G P K L L Q T L     |     |     |
| ATGLR2.2 | G L W A Y D A T T A L A M A I E D A G . . I N N M T F S N . . . V D T G K N V S E L D G L G L S Q F G P K L L Q T V     |     |     |
| ATGLR2.3 | G L W A Y D A T T A L A V A I E E A G . . T N N M T F S K V . . V D T G R N V S E L E A L G L S Q F G P K L L Q T L     |     |     |
| ATGLR2.4 | G L R A Y D A T T A L A M A V E E A G . . T T N L T F S K . . . M D G . . R N I S D L E A L L S V S E Y G P K L I R S L |     |     |
| ATGLR2.5 | A C W A Y D A T A L A M S V E E I R . . H V N M S F N T T K E D T S R D D I G T D L D E L G V A L S G P K L L D A L     |     |     |
| ATGLR2.6 | E C W G Y D T A T A L A M S I E E I S S N V N M S F S Q T K R N T S R D D T G T D L D D L S F A L S G P K L L Q A L     |     |     |
| ATGLR2.7 | A R L A Y D I T A L A M A V E K T N . . I K S L R Y D H P . . I A S G N N K T N I G T L G V S R Y G P S L L K A L       |     |     |
| ATGLR2.8 | G L W A Y D S T T A L A M A V E K T N . . I S S F P Y N N A . . S G S S N M M T D L G T L H V S R Y G P S L L E A L     |     |     |
| ATGLR2.9 | A L W A Y D S I T A L A K A V E K A N . . T K S L W Y D N G . . S T L S K N R T D L G N V G V S R Y G P S L Q K A F     |     |     |
| ATGLR3.1 | G L W A Y D T V W I I A R A V K T L L E A G G N L S F S N D A K L G S L K G E A L N L S A L S R F D Q G S Q L D Y I     |     |     |
| ATGLR3.2 | G L Y A Y D T V W I I A R A V K R L L D S R A N I S F S S D P K L T S M K G G S L N I G A L S I F D Q G S Q F L D Y I   |     |     |
| ATGLR3.3 | G L Y A Y D S V M L L A R G L D K F F K D G G N I S F S N H S M L N T L G K S G N L N L E A M T V F D G G E A L L K D I |     |     |
| ATGLR3.4 | A M Y A Y D S V W L V A R A L D V F F R E N N N I T F S N D P N L H K T N G S T I Q L S A L S V S R Y G E K F M K I I   |     |     |
| ATGLR3.5 | A L Y A Y D S V W L V A R A L D V F F S Q G N T V T F S N D P S L R N T N D S G I K L S K L H I F N E G E R F L Q V I   |     |     |
| ATGLR3.6 | A L Y A Y D T V W L L A Q A I D D F F K K G G N V S F S K N P I I S E L G G G N L H L D A L K V F D G K I F L E S I     |     |     |
| ATGLR3.7 | A L H A Y D T V W M I A H G I E E L L N E G I N I T F S Y S E K L L H A R G T K L H L E K I K F F N S G E L L E K I     |     |     |

(D03\_2176763) SNP2                      SNP3

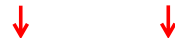

|          | 140                                                                                                                   | 150 | 160 | 170 | 180 |
|----------|-----------------------------------------------------------------------------------------------------------------------|-----|-----|-----|-----|
| GhGLR4.8 | A R . . E I A S L I G D Y L W L K P G T T V Y E E S D R I S D L D I V T F N L N S R N P T P N T . . . . .             |     |     |     |     |
| GluA2    | L K Q V Q V E G L S C N I K F D Q N G K R I N Y T I N I M E L K T N G P R K I G Y W S E V D K M V V T . . . . .       |     |     |     |     |
| ATGLR1.1 | R H S R F K G L S G D I Q I S D N K F I S E T F E I V N I G R E K Q R R I G L W S G G S F S Q R R Q . . . . .         |     |     |     |     |
| ATGLR1.2 | K E S R F K G L S G F Q L D D M K L L S D K F E I V N M I G S E R R R V G F W N S N G S F S N R R Q L S . . S T H     |     |     |     |     |
| ATGLR1.3 | T K T R F N G L S G D F Q L N D K K L L S N K F E I V N M I G S S E R R R V G F L N S N G S F S N R R H L S . . S T H |     |     |     |     |
| ATGLR1.4 | P E S A K H K G L S G D I K F I D K K F I S D K F E I V N M I G R G E R S V G L W N S G S F I S N R R R R L . . S S T |     |     |     |     |
| ATGLR2.1 | S R V R F Q G L A G D F Q F I N G E L Q P S V F E I V N V N Q G G R T I G F W M K E Y G L F K N V D Q K . . P A S     |     |     |     |     |
| ATGLR2.2 | S T V Q F K G L A G D F H F V S G Q L Q P S V F E I V N M I G T G E R S I G F W T E G N G L V K S L R V D . . . . .   |     |     |     |     |
| ATGLR2.3 | L T V Q F R G L A G E F R F F R G Q L Q P S V F E I V N I N T G E K S I G F W K E G N G L V K K L D Q E . . A S S     |     |     |     |     |
| ATGLR2.4 | S Q I Q F K G L S G D Y H F V D G Q L H A S V F E I V N V I D G G G I L V G F W T Q D K G L V K D L S P S . . S G T   |     |     |     |     |
| ATGLR2.5 | S T V S F K G V A G R F Q L K N G K L E A T T F K I I N I E E S G E R T V G F W K S K V G L V K S L R V D . . . . .   |     |     |     |     |
| ATGLR2.6 | A T V S F K G V A G R F Q L K N G K L E A T T F K I V N I E E S G E R T V G F W K S K V G L V K S L R V N . . Q T G   |     |     |     |     |
| ATGLR2.7 | S N V R F N G L A G E F E L I N G Q L E S S V F D V I N I I G S E E R I I G L W R P S N G I V N A K S K N . . T T S   |     |     |     |     |
| ATGLR2.8 | S E I R F N G L A G R F N L I D R Q L E S P K F E I I N F V G N E E R I V G F W T P S N G L V N V N S N K . . T T S   |     |     |     |     |
| ATGLR2.9 | S E V R F N G L A G E F K L I D G Q L Q S P K F E I I N F V G N E E R I I G F W T P R D G L M D A T S S N . . K K     |     |     |     |     |
| ATGLR3.1 | V H T K M S G L T G P V Q F H P D R S M L Q P S Y D I I N I V D D R V H Q I G Y W S N Y S G L S I V P P S . F Y S K   |     |     |     |     |
| ATGLR3.2 | V N T N M T G V T G Q I Q F L P D R S M I Q P S Y D I I N V D D G F R Q I G Y W S N H S G L S I I P P S . L Y K K     |     |     |     |     |
| ATGLR3.3 | L G T R M V G L T G Q L Q F T P D R S R T R P A Y D I I N V A G T G V R Q I G Y W S N H S G L S T V L P E L L Y T K E |     |     |     |     |
| ATGLR3.4 | L G M N H T G V T G P I Q F D S D R N R V N P A Y E V L N L E G T A P R T V G Y W S N H S G L S V V H P E T . L Y S R |     |     |     |     |
| ATGLR3.5 | L E M N Y T G L T G Q I E F N S E K N R I N P A Y D I I N I K S T G P L R V G Y W S N H T G F S V A P P E T . L Y S K |     |     |     |     |
| ATGLR3.6 | L Q V D R I G L T G R M K F T S D R N L V N P A F D V L N V I G T G Y T I G Y W F N H S G L S V M P . . . . A D E     |     |     |     |     |
| ATGLR3.7 | L K V N F T G I A G Q V Q F G S G R N V I G D Y E I I N V N K T D V H T V G F W S R N G G F S V V A P K T R H S Q     |     |     |     |     |

190                      200                      210                      220

|          |                                                                                                                             |  |  |  |  |
|----------|-----------------------------------------------------------------------------------------------------------------------------|--|--|--|--|
| GhGLR4.8 | . . . . . G G I Q M A A T L S F S T S K P V H Y . . . . . Y T E I S T A V P V R S I P M Q F L N I S Q D E                   |  |  |  |  |
| GluA2    | . . . . . . . . . . . L T E L P S G N D T S G . . . . . L E N K T V V T T I L E S P Y V M M K K N H E                       |  |  |  |  |
| ATGLR1.1 | . . . . . . . . . . . I V W P G R S R K I P R H R V L A E K . . G E K K V L R V L V T A G N K V P H L V S V R P D P         |  |  |  |  |
| ATGLR1.2 | . . . . . . . . . . . D N L E T I I W P G S A Q S P K G R S L R E . . S G R K K L R V L V T S S N R F P R L M K V E T D P   |  |  |  |  |
| ATGLR1.3 | . . . . . . . . . . . N K L E T I I W P G S A Q S P K G T S L I D . . S D R K K L R V L V T S S N R F P R L M K V E T D P   |  |  |  |  |
| ATGLR1.4 | . . . . . . . . . . . K A L E T I I W P G S T R I P K I R S L K E K R H G K K K K L R V L V P A G N I T P Q I L E V K T D F |  |  |  |  |
| ATGLR2.1 | K T T F S S W Q D R L R P I I W P G D T T S V P K G W E I P T . . . N G K R L Q I G V P V N N T F Q Q F V K A T R D P       |  |  |  |  |
| ATGLR2.2 | I G T L S T W P D H L K H I I W P G E A V S V P K G W E I P T . . . N G K K L R I G V P K R I G Y T D L V K V T R D P       |  |  |  |  |
| ATGLR2.3 | I S A L S T W K D H L K H I V W P G E A D S V P K G W Q I P T . . . K G K K L R I G V P K R T G Y T D L V K V T R D P       |  |  |  |  |
| ATGLR2.4 | T R I F S S W K N H L N P I L W P G I T L T V P K G W E I P T . . . N G K E L Q I G V P V G T F P Q F V K V T T D P         |  |  |  |  |
| ATGLR2.5 | . . K V S H S S R R L R P I I W P G D T I F V P K G W E F P T . . . N A K K L R I A V P K K D G F N N F V E V T K D E       |  |  |  |  |
| ATGLR2.6 | I . K I S H S S H R L R P I I W P G D T I F V P K G W E F P T . . . N A K K L R I A V P K K D G F N N F V E V T K D A       |  |  |  |  |
| ATGLR2.7 | . . . . . V L G E R L G P V I W P G K S K D V P K G W Q I P T . . . N G K M L R V G I P V K K G F L E F V D A K I D P       |  |  |  |  |
| ATGLR2.8 | . . . . . F T G E R F G P L I W P G K S T I V P K G W E I P T . . . N G K K I K V G V P V K K G F F N F V E V I T D P       |  |  |  |  |
| ATGLR2.9 | . . . . . . . . . . . T L G P V I W P G K S K I V P K G W E I P . . . . . G K K L R V G V P M K K G F F D F V K V T I N P   |  |  |  |  |
| ATGLR3.1 | P P N R S S S N Q H L N S V T W P G G T S V T P R G W I F R N . . . N G R R L R I G V P D R A S F K D F V S R V N G .       |  |  |  |  |
| ATGLR3.2 | L S N R S S S N Q H L N N V T W P G T S E T P R G W V F P N . . . N G R R L R I G V P D R A S F K E F V S R L D G .         |  |  |  |  |
| ATGLR3.3 | K P N M S T S P K L K H V I W P G E T F T K P R G W V F S N . . . N G K E L K I G V P L R V S Y K D F V S Q I R G .         |  |  |  |  |
| ATGLR3.4 | P P N T S T A N Q R L K G I I Y P G E V T K P P R G W V F P N . . . N G K P L R I G V P N R V S Y T D Y V S K D K . .       |  |  |  |  |
| ATGLR3.5 | P S N T S A K D Q R L N E I I W P G E V I K P P R G W V F P E . . . N G K P L K I G V P N R V S Y K N Y A S K D K . .       |  |  |  |  |
| ATGLR3.6 | M E N T S F S G Q K L H S V V W P G H S I K I P R G W V F S N . . . N G R H L R I G V P N R Y R F E E V V S V K . . .       |  |  |  |  |
| ATGLR3.7 | K K T S F V S D E K L G D I T W P G G R E K P R G W V I A D . . . S A D P L K I V V E R R V S F V E F V T E E K N .         |  |  |  |  |

# S1

```
230      240      250      260      270
GhGLR4.8 KNHNEAQITGFWTDLFKEAVAVMPINITYKLVPFY..GSD.....DQLFKALVRR...
GluA2      MLEGNERIYEGYCVDLAEIAKHCGFKYKLTIVGDGKYGARDADTKIWNMGVGEGLVYG...
ATGLR1.1  ETGVN.TVSGFCVEVFKTCIAPFNYLELFIPIY.....RGNNDNLAYLSTQR.D
ATGLR1.2  ITHEITIVGFCIEVFQASIAPFNVEVEYIRW.....LN....GTNYTKLAYALHSQK.D
ATGLR1.3  VTNEL.IVSGFCIEVFRAISPFNVEVEYIPW.....LN....GSNDNLAYALHSQK.D
ATGLR1.4  KTGVT.AATGYCIDVFEISLFPFNVEVEYIPWP.GA..IN....YKNYNDLVYTLYSQK.D
ATGLR2.1  ITNST.IFSGFSIDYFEAVIQAIPIYDISYDFIPFQ..DGG.....YDALVYQVYLG...
ATGLR2.2  ITNST.VVKGFCIDVFEAVIQAMPYDVSYEFPF..KPNGEPAGNHNDLVHQVYLG...
ATGLR2.3  ITNST.VVTGFCIDVFEAVIRELPYDVSYEFPF..KPDGKTAGNYNDLVYQVYLG...
ATGLR2.4  LTHET.IVITGFCIDVFEAVIQAMPYDVSYRFPF..DD.....D.GKTN...
ATGLR2.5  NTNVP.TVITGFCIDVNTVMSQMPYAVSYEYIPFD..TPDGKPRGSYDEMVYVFLG...
ATGLR2.6  NTNAP.TITGFCIDVDTAMRQMPYAVPYEYIPF..TPDGKPRGSYDEMVYVFLG...
ATGLR2.7  ISNAM.TPTGYCIEIFEAVLKKLPYSVIPKYIAFL..SPDEN...YDEMVYQVYTG...
ATGLR2.8  ITNIT.TPKGYAIDIFEAAALKKLPYSVIPQYRFE..SPDDD...YDDLVYKVDNG...
ATGLR2.9  ITNKK.TPTGYAIEIFEAAALKELPYLVPIPEYVFE..SPNN...YNNLVYQVYDK...
ATGLR3.1  ...SSNKVQGYCIDVFEAAVKLLSPYVPEHFIFFG..DGLTN..PNYNNLVYKVTGDV...
ATGLR3.2  ...S.NKVQGYAIDVFEAAVKLLISYVPPEHFVLF..DGLKN..PNFNEFVNNVTIGV...
ATGLR3.3  ...TENMFKGFCIDVFEAAVNLNLPYAVPVKFFPYG..NGKEN..PSYTHMVEMITTGN...
ATGLR3.4  ...NPPGVRGYCIDVFEAAIELLPYVVPRTYILYG..DGKRN..PSYDNLVNEVADNSA...
ATGLR3.5  ...NPLGVKGFCDIFFEAAIQLPYVVPRTYILYG..DGKRN..PSYDNLVNEVADNSA...
ATGLR3.6  ...SNGMITGFCVDVFEAAINLNPYVVPFELVAFG..NGHDN..PSNSELRLITTVGV...
ATGLR3.7  ...SSHRITQFCIDVFEAAIKFVPYVVPYIFEPFG..NGHSS..PNYNNLVYKVTGDV...
```

```
280      290      300      310      320      330
GhGLR4.8  TFDAAIGLTVMTRKGSLELFSYPIYFEVGMPLVMKEKPEPN.QVFSFMMPTNEMCTLA
GluA2      KADIAIAPLTIITLVREEVIDFSKPFMSLGISIMIKKPKQSKPGVFSFLDPLAYEIWMCIIV
ATGLR1.1  KYDAAVGDITITSNRSLYVDFTLFPYTDIGIGILT VKKKSQ..GMWTFDPFEKSLWLASG
ATGLR1.2  KYDAAVGDITITSDRSMYVDFTLFPYTEMGLGIVAKERS...MWFVQPLTPNLWITSA
ATGLR1.3  KYDAAVGDITITSNRSTYVDFTLFPYTEMGLGIVAKERS...MWFVQPLTPNLWITSA
ATGLR1.4  KYDAAVGDITITDNRSLYVDFTLFPYTEMGLAVVTAKDKS...MWIFKPLTSLWLITIA
ATGLR2.1  KYDAAVGDITISSNRSMYVDFSLPYPDMSGVGLVVPVKDSVRRSSTIFLMLTLALWLTLSL
ATGLR2.2  QFDAAVGDITILANRSFYVDFTLFPYMSGVGLVPLKDEVKRDKFSFLKPLSIELWLTTL
ATGLR2.3  RYDAAVGDITILVNRSSYVDFTLFPYIKSGVGLVEMTDPVKRDYILFMKPLTSWKLWLTSL
ATGLR2.4  VFDAAVGDITILANRSYVDFTLFPYTTSGVGMVVP LKDNVARS LIFKPLTPGLWGMTL
ATGLR2.5  EFDGAVGDITILANRSHYVDFALPYSETGIVFLVPVKDGKEKGEWVFLKPLTKEWLVTA
ATGLR2.6  EFDGAVGDITILANRSTYVDFALPYSETGIVVVVPVKDEREKKGWVFLKPLTRWLVTA
ATGLR2.7  AYDAAVGDITIVANRSLYVDFTLFPYTESGVMMPVKDN..KNTWVFLRPWSLDLWVTA
ATGLR2.8  TLDAAVGDITITAYRSLYADFTLPYTESGVMMPVVDNENKNTWVFLKPLTWLVTA
ATGLR2.9  TWDAAVGDITITANRSLYADFTLPYTESGVMMPVVDNENKNTWVFLKPLTWLVTA
ATGLR3.1  FDDAAVGDIAIVTKRTRIVDFTPYIESGLVVA PVRTLNE.NPWAFLRPFTLPMWAVTA
ATGLR3.2  FDDAAVGDIAIVTKRTRIVDFTPYIESGLVVA PVRTLND.TPWAFLRPFTLPMWAVTA
ATGLR3.3  FDDAAVGDIAIVTNRKIYVDFTPYIAASGLVVA PFKLLNS.GAWAFLRPFRNRLWAVTG
ATGLR3.4  FDDAAVGDITIVTNRTRYVDFTPYIESGLVVA PVKEAKS.SPWSFLKPFTEIEMWAVTG
ATGLR3.5  FDDAAVGDITIVTNRTKYVDFTPYIESGLVVA PVKGAKS.SPWSFLKPFTEIEMWAVTG
ATGLR3.6  YDAAVGDITITITERTKMADFTQPYVESGLVVA PVRKLG.SAMAFLRPFTPQMWLIAA
ATGLR3.7  YDAAVGDITAVPSRSKLVDFSQPYASTGLVVTIPANDDN..ATWIFLRPFTSRWLVVLI
```

```
340      350      360      370
GhGLR4.8  AMTMFNFAFVIWLV.....ESRTGHESVG.....AIFWFP LATLIFYGGHR
GluA2      FAYIGVSVVLFVLSRFSPYEWHTTEEFEDGRETOSESSTNEFGIFNSLWFSLGAFMQGCD
ATGLR1.1  AFVFLTGIVVWLV.....ERSVNEPFGQSWG.QQLSMMLWFGFSTIVFA.HR
ATGLR1.2  AFVFLTGIVVWLV.....ERAENKEFGQSWP.QQIGVVIWFGFSTLVYA.HR
ATGLR1.3  FVFLTGIVVWLV.....ERAENKEFGQSWP.QQIGVVIWFGFSTLVYA.HR
ATGLR1.4  SFVFLTGIVVWLV.....ERHDNADFQGSFC.QQIGTLLCFGFSTLVYA.HR
ATGLR2.1  LSFFIIGLVVWLV.....EHRVNDPFGPQ.YQLSTIFWFSFSIMVFA.PR
ATGLR2.2  VFVFLVGISVWTL.....EHRVNSDFRGPAN.YQASTIFWFAFSTMVFA.PR
ATGLR2.3  ISFFLVGCTVWV.....EYKRNDPFGPQ.YQASTIFWFAFSTMVFA.PR
ATGLR2.4  GSFVVGFFVWLV.....EHRVNSDFRGPQ.YQISTMFWFAFSTMVFA.PR
ATGLR2.5  ASFFLYIGIMVWIF.....EYQADEFRQMIIDKISVFFWFAFSTLFFA.HR
ATGLR2.6  ASFFLYIGIM.....EYQADEFRQMIIDKISVFFWFAFSTLFFA.HR
ATGLR2.7  CFFVYIGFVWVIL.....EHRVNDPFRGPPH.HQIGTSFVFAFSTMVFA.HR
ATGLR2.8  CFFVYIGFVWVLF.....EHRVNDPFRGPPH.HQIGTSFVFAFSTMVFA.HR
ATGLR2.9  CFFVYIGFVWVLF.....EHRVNDPFRGPPQ.YQIGTSLWFAFSTMVFA.HR
ATGLR3.1  SFVIVGAAIWIIL.....EHRINDPFRGPPR.RQIITILWFAFSTMVFA.HR
ATGLR3.2  AFVFLVGSVIWIIL.....EHRINDPFRGPPR.RQIITILWFAFSTMVFA.HR
ATGLR3.3  CFFVIVGAVIWIIL.....EHRINDPFRGPPR.RQIITILWFAFSTMVFA.HR
ATGLR3.4  GFFVIVGAVIWIIL.....EHRINDPFRGPPR.RQIITILWFAFSTMVFA.HR
ATGLR3.5  ALVFLVGAVIWIIL.....EHRINDPFRGPPR.RQIITILWFAFSTMVFA.HR
ATGLR3.6  ASVFLVGAVIWVCL.....EHRINDPFRGPPR.RQIITILWFAFSTMVFA.HR
ATGLR3.7  VSVFLVIAVVIWIIL.....EHRINDPFRGPPR.RQIITILWFAFSTMVFA.HR
```

SYTASLTS motif

|          | 380                                                                                                                       | 390 | 400 | 410 | 420 | 430 |
|----------|---------------------------------------------------------------------------------------------------------------------------|-----|-----|-----|-----|-----|
| GhGLR4.8 | E S P R S N L T Y F V L A P W L V L I L V V S S T Y T Q S F T S M I T S S D T E S S S C L D I E D L K K T N A I V G C D   |     |     |     |     |     |
| GluA2    | I S P R S L S G R I V G G V W F F T L I I S S Y T A N L A A F L T V E R M V S P I E S A E D L S K Q T E I A Y G T L       |     |     |     |     |     |
| ATGLR1.1 | E K L Q K M S S R F L V I V W V F V V L I L T S S Y S A N L T S T K T I S R M Q L N . . . . . H Q M V F G G S             |     |     |     |     |     |
| ATGLR1.2 | E K L Q H N L S R F V V T V W V F A V L I L V T S Y T A T L T S M M T V Q Q I R F N A . . . . . N E D Y V G H L           |     |     |     |     |     |
| ATGLR1.3 | E K L K H N L S R F V V T V W V F A V L I L T A S Y T A T L T S M M T V Q Q I R F N S . . . . . N E D Y V G H L           |     |     |     |     |     |
| ATGLR1.4 | E R L Q H N M S R F V V I V W I F A V L I L T S N Y T A T L T S V M T V Q Q I R G L K . . . . . S N E N I G F F           |     |     |     |     |     |
| ATGLR2.1 | E R V L S F W A R V V V I I W Y F V L V L V T Q S Y T A S L A S L L T T Q H L H P T V T N . I N S L L A K G E S V G Y Q   |     |     |     |     |     |
| ATGLR2.2 | E R V L S F G A R S L V V T W Y F V L L V L T Q S Y T A S L A S L L T S Q Q L N P T I T S . M S S L L H R G E T V G Y Q   |     |     |     |     |     |
| ATGLR2.3 | E R V F S F W A R A L V I A W Y F L V L V L T Q S Y T A S L A S L L T S Q K L N P T I T S . M S S L L E K G E T V G Y Q   |     |     |     |     |     |
| ATGLR2.4 | E R V M S F T A R V V V I T W Y F I V L V L T Q S Y T A S L S S L L T T Q Q L N P T E T S . I K N V L A K G G P V A Y Q   |     |     |     |     |     |
| ATGLR2.5 | R P S E S F F T R V L V V V W C F V L L I L T Q S Y T A T L T S M L T V Q E L R P T V R H . M D D L R K S G V N I G Y Q   |     |     |     |     |     |
| ATGLR2.6 | . . . . . S Y T A T L T S M L T V Q E L R P T V R H . M D D L R N S G V N I G Y Q                                         |     |     |     |     |     |
| ATGLR2.7 | E K V V S N L A R F V V L V W C F V V L V L I Q S Y T A N L T S F F T V K L L Q P T V T N . W K D L I K F N K N I G Y Q   |     |     |     |     |     |
| ATGLR2.8 | E K V V S N L A R F V V V V W C F V V L V L T Q S Y T A N L T S F L T V Q R F O P A A I N . V K D L I K N G D Y V G Y Q   |     |     |     |     |     |
| ATGLR2.9 | E N V V S N L A R F V V V V W C F V V L V L T Q S Y T A S L T S F L T V Q S L Q P T V T N . V N D L I K N R D C V G Y Q   |     |     |     |     |     |
| ATGLR3.1 | E T T V S T L G R M V L L I W L F V V L I I T S S Y T A S L T S I L T V Q Q L N S P I K G . V D T L I S S T G R I G Y Q   |     |     |     |     |     |
| ATGLR3.2 | E N T V S T L G R A V L L I W L F V V L I I T S S Y T A S L T S I L T V Q Q L N S P I R G . V D T L I S S S G R V G F Q   |     |     |     |     |     |
| ATGLR3.3 | E N T V S T L G R L V L I I W L F V V L I I N S S Y T A S L T S I L T V Q Q L S S P I K G . I E S L R R E R D D P I G Y Q |     |     |     |     |     |
| ATGLR3.4 | E N T V S S L G R F V L I I W L F V V L I I N S S Y T A S L T S I L T I R Q L T S R I E G . I D S L V T S N E P I G V Q   |     |     |     |     |     |
| ATGLR3.5 | E N T V S T L G R F V L L V W L F V V L I I N S S Y T A S L T S I L T V Q Q L T S R I E G . M D T L I A S N E P I G V Q   |     |     |     |     |     |
| ATGLR3.6 | E T T T S N L G R I V L I I W L F V V L I I N S S Y T A S L T S I L T V H Q L S S P I K G . I E T L Q T N H D P I G Y P   |     |     |     |     |     |
| ATGLR3.7 | E D T I S N L A R L V M I V W L F L L M V L T A S Y T A N L T S I L T V Q Q L P S A I T G . I D S L R A S E V P I G Y Q   |     |     |     |     |     |

S2

|          | 440                                                                                                                       | 450 | 460 | 470 | 480 |
|----------|---------------------------------------------------------------------------------------------------------------------------|-----|-----|-----|-----|
| GhGLR4.8 | M E D S I M L Q H L V E Y I G F Q R K N I K H I A Q S S I D D Y A K A L S T G . . . . . K T K A A F F W A P Y S G         |     |     |     |     |
| GluA2    | D S G S T K E F F R R S K I A V F D K M W T Y M R S A E P S V F V R T T A E G V A R V R K S K G K Y A Y L L E S T M N E   |     |     |     |     |
| ATGLR1.1 | T T . S M T A K L G . . . . . S I N A V E A Y A Q L L R D G . . . . . T L N H V I N E I P Y L S                           |     |     |     |     |
| ATGLR1.2 | S G . S L I A N A A L T N S S L R A M . . R L L G L N T S E D Y A Q A L M N K . . . . . S V S Y I V S E L P Y L K         |     |     |     |     |
| ATGLR1.3 | S G . S L I A N V A L T S S S L R A M . . R S L G L N S A A D Y A Q A L N K . . . . . T V S F V V D E L P Y L K           |     |     |     |     |
| ATGLR1.4 | S A . S I A A N V V N D N P T F Q G P . R Y K G L K T A D D F T N A L R N G . . . . . T I S F I V D E V P Y V K           |     |     |     |     |
| ATGLR2.1 | S . . S F I L G R L R . D S G F S E A . S L V S Y G S P E H C D A L L S K G Q A . . . . . E G G V S A A F M E V P Y V R   |     |     |     |     |
| ATGLR2.2 | R T . S F I L G K L N . E T G F P Q S . S L V P F D T A E E C D E L L K K G P K . . . . . N G G V A A A F L G T P Y V R   |     |     |     |     |
| ATGLR2.3 | R T . S F I L G K L K . E R G F P Q S . S L V P F D T A E E C D E L L S K G P K . . . . . K G G V S G A F L E I P Y L R   |     |     |     |     |
| ATGLR2.4 | R D . S F V L G R L R . E S G F P E S . R L V P F T S P E K C E E L L N K G P S . . . . . K G G V S A A F M E V P Y V R   |     |     |     |     |
| ATGLR2.5 | T G . S F T F E R L K . Q M R F D E S . R L K T Y N S P E E M R E L F L H K S S . . . . . N G G I D A A F D E V A Y I K   |     |     |     |     |
| ATGLR2.6 | T G . S F T F E R L K . Q M G Y K E S . R L K T Y D T P Q E M H E L F L K K S S . . . . . N G G I D A A F D E V A Y I K   |     |     |     |     |
| ATGLR2.7 | R G . T F V R E L L K . S Q G F D E S . Q L K P F G S A V E C D E L F S N G . . . . . T I T A S F D E V A Y I K           |     |     |     |     |
| ATGLR2.8 | H G . A F V K D F L I . K E G F N V S . K L K P F G S S E E C H A L L S N G . . . . . S I S A A F D E V A Y L R           |     |     |     |     |
| ATGLR2.9 | G G . A F V K D I L L . G L G F H E D . Q L K P F D S A K D A D D L L S K G K S . . . . . K . G I A A A F D E V A Y L K   |     |     |     |     |
| ATGLR3.1 | V G . S F A E N Y M T D E L N I A S S . R L V P L A S P E E Y A N A L Q N G . . . . . T V A A I V D E R P Y I D           |     |     |     |     |
| ATGLR3.2 | V G . S Y A E N Y M I D E L N I A R S . R L V P L G S P K E Y A A A L Q N G . . . . . T V A A I V D E R P Y V D           |     |     |     |     |
| ATGLR3.3 | V G . S F A E S Y L R N E L N I S E S . R L V P L G T P E A Y A K A L K D G P S . . . . . K G G V A A I V D E R P Y V D   |     |     |     |     |
| ATGLR3.4 | D G . T F A R N Y L I N E L N I L P S . R I V P L K D E E Q Y L S A L Q R G P N . . . . . A G G V A A I V D E L P Y I E   |     |     |     |     |
| ATGLR3.5 | D G . T F A W K F L V N E L N I A P S . R I V P L K D E E E Y L S A L Q R G P R . . . . . G G G V A A I V D E L P Y I K   |     |     |     |     |
| ATGLR3.6 | Q G . S F V R D Y L I H E L N I H V S . R L V P L R S P E E Y D K A L R D G P G . . . . . K G G V A A V D E R A Y I E     |     |     |     |     |
| ATGLR3.7 | A G . T F T L E Y L T Y S L G M A R S . R L V P L D S T E E Y E K A L K L G P T . . . . . N W G G V A A I V D E L P Y I E |     |     |     |     |

SNP4

|          | 490                                                                                                                     | 500 | 510 | 520 | 530 | 540 |
|----------|-------------------------------------------------------------------------------------------------------------------------|-----|-----|-----|-----|-----|
| GhGLR4.8 | L F L A K Y C K G F R S W G P N H N L R G S S V I F P R D S P F A P Y M S E A M V R L C G S G K F K R M K D L Q S F P   |     |     |     |     |     |
| GluA2    | Y I E Q R K P C D T M K V G G N L D S K G Y G I A T P K G S S L R T P V N L A V L K L S E Q G V L D K L K N K W Y D K   |     |     |     |     |     |
| ATGLR1.1 | I L I G N Y P N D F V M T D R V T N T N G F G F M F Q K G S D L V P K V S R E I A K L R S L G M I K D M E K K W F Q K L |     |     |     |     |     |
| ATGLR1.2 | I L L G E N P G H F L M V K T Q S T T N G F G F M F Q K G S E L A P N V S R E I A K L R T S E R L N E M E R R W F D K Q |     |     |     |     |     |
| ATGLR1.3 | V V L G E N P I H F F M V K T Q S T T N G F G F M F Q K G F E L V P N V S R E I S K L R T S E K L N E M E K R W F D N Q |     |     |     |     |     |
| ATGLR1.4 | L F V A K H P S E F V I V E T E S V T N G F G F A F Q K G S P L V Q K V S R E I E K L R R T E K L K A I E N W W F Q R Q |     |     |     |     |     |
| ATGLR2.1 | I F L G Q Y C N K Y K M V Q T P F K V D G L G F V F P I G S P L V A D I S R A I L K V E E S N K A N Q L E N A W F K P I |     |     |     |     |     |
| ATGLR2.2 | L F L G Q Y C N T Y K M V E E P F N V D G F G F V F P I G S P L V A D V S R A I L K V A E S P K A M E L E H A W F K K K |     |     |     |     |     |
| ATGLR2.3 | L F L G Q F C N T Y K M V E E P F N V D G F G F V F P I G S P L V A D V S R A I L K V A E S P K A M E L E R A W F K K K |     |     |     |     |     |
| ATGLR2.4 | V F L G Q Y C K Y K M V E V P F D V D G F G F V F P I G S P L V A D V S R A I L K V A E S N K A T Q L E T A W F K N I   |     |     |     |     |     |
| ATGLR2.5 | L F M A K Y C S E Y S I I E P T F K A D G F G F A F P L G S P L V S D I S R Q I L N I T E G D A M K A I E N K W F L G . |     |     |     |     |     |
| ATGLR2.6 | L F M A K Y C S K Y T I I E P T F K A D G F G F A F P L G S P L V P D L S R Q I L N I T E G E T M K A I E N K W L L G . |     |     |     |     |     |
| ATGLR2.7 | V I L S Q N S S K Y T M V E P T F K T A G F G F V F P K K S P L T D D V S R A I L N V T Q G E E M Q H I E N K W F K K . |     |     |     |     |     |
| ATGLR2.8 | A I L S Q Y C S K Y A I V E P T F K T A G F G F A F P R N S P L T G D V S K A I L N V T Q G E M Q H I E N K W F M K .   |     |     |     |     |     |
| ATGLR2.9 | A I L S Q S C S K Y V M V E P T F K T G F G F A F P K N S P L T G E F S R A I L N L T Q N N V T Q Q I E D R W F P K .   |     |     |     |     |     |
| ATGLR3.1 | L F L S . D Y C K F A I R G Q E F T R C G W G F A F P R D S P L A V D M S T A I L G L S E T G E L Q K I H D R W L S . K |     |     |     |     |     |
| ATGLR3.2 | L F L S . E F C G F A I R G Q E F T R S G W G F A F P R D S P L A I D M S T A I L G L S E T G Q L Q K I H D K W L S . R |     |     |     |     |     |
| ATGLR3.3 | L F L S . S N C A Y R I V G Q E F T K S G W G F A F P R D S P L A I D L S T A I L L A E N G D L Q R I H D K W L M . K   |     |     |     |     |     |
| ATGLR3.4 | V L L T N S N C K F R T V G Q E F T R T G W G F A F Q R D S P L A V D M S T A I L Q L S E E G E L E K I H R K W L N Y K |     |     |     |     |     |
| ATGLR3.5 | A L L S N S N C K F R T V G Q E F T R T G W G F A F Q R D S P L A V D M S T A I L Q L A E E G K L E K I R K W L T Y D   |     |     |     |     |     |
| ATGLR3.6 | L F L S . N R C E F G I V G Q E F T K N G W G F A F P R N S P L A V D V S A A I L Q L S E N G D M Q R I R D K W L L . R |     |     |     |     |     |
| ATGLR3.7 | L F L A . E R T G E K I V G E P F M H R G W G F A F K R D S P L A I D M S T A I L K L S E T R K L Q E I R K K W L C . K |     |     |     |     |     |

|          | 550               | 560              | 570       | 580   | 590         |         |
|----------|-------------------|------------------|-----------|-------|-------------|---------|
| GhGLR4.8 | ECSSST.....       | IDVTMKR.....     | GIGPGPFS  | GLFII | SGTASAVAILI | TVIRPMR |
| GluA2    | GECGAKD.....      | SGSKEKTS.....    | ALSLSNVA  | GVFYI | LVGGGLG     | LAMLV   |
| ATGLR1.1 | DLSLVHSNTEEVASTND | DDEASK.....      | RFTFRELR  | GLFII | AGAAHV      | LVLAL   |
| ATGLR1.2 | LP.....           | YTTDDTSN.....    | PIITLYRFR | GLFMI | TGVSFAF     | FALAV   |
| ATGLR1.3 | LP.....           | YTTDDTSN.....    | PIITLYRFR | GLFII | TGVSFAF     | FALAV   |
| ATGLR1.4 | TTS.....          | ATSEDTFH.....    | PLTVYTFR  | GLFMI | TGVSFAF     | FALIV   |
| ATGLR2.1 | DESCPD.....       | PLTNPDPNPSVSFRQ  | LGFDSF    | WVLF  | LVAAIV      | CTMAL   |
| ATGLR2.2 | EQSCPD.....       | PVTNPDSNPTVTAIQ  | LGVGSF    | WVLF  | VVVF        | CVLAL   |
| ATGLR2.3 | EQSCPD.....       | PIITNPDPNPSFTSRO | LDIDSF    | FLFV  | GVLV        | CVMAL   |
| ATGLR2.4 | DKTCPD.....       | PMNPNPDPNPTVSFRK | LSLDSF    | LLFV  | AAAV        | CTLAL   |
| ATGLR2.5 | EKHCLD.....       | STITSDSP.....    | IQLDHH    | SFEA  | LFLI        | VFVVS   |
| ATGLR2.6 | EKHCLD.....       | STITSDSP.....    | IRLDHH    | SFEA  | LFTI        | VFVVS   |
| ATGLR2.7 | PNNCPD.....       | LNITSLSSN.....   | HLSLS     | SF    | WGLF        | LIAGIAS |
| ATGLR2.8 | QNDCPD.....       | PKTALSSN.....    | RLSLR     | SF    | WGLF        | LIAGIAS |
| ATGLR2.9 | KNDCPD.....       | PMTALSSN.....    | RNLNS     | SF    | WGLF        | LIAGIAS |
| ATGLR3.1 | SNCSSPHG.....     | SQSSG.DSE.....   | QLNVH     | SF    | WGMFL       | VGIA    |
| ATGLR3.2 | SNCSSNLNG.....    | SVSDEDESE.....   | QLKLR     | SF    | WGLF        | LVCGIS  |
| ATGLR3.3 | NACTLEN.....      | PMAELESD.....    | RHLK      | SF    | WGLF        | LVCGVA  |
| ATGLR3.4 | HECSMQI.....      | SNSSEDS.....     | QLSLK     | SF    | WGLF        | LVCGIT  |
| ATGLR3.5 | HECTMQI.....      | SSTENY.....      | QISVQ     | SF    | WGLF        | LVCGV   |
| ATGLR3.6 | KACSLQG.....      | AEIEVD.....      | RLLEK     | SF    | WGLF        | VVCGVA  |
| ATGLR3.7 | TNCAGKSN.....     | WNPEPN.....      | QLHLK     | SF    | WGLY        | LVCAITV |

|          | 600                                                            |
|----------|----------------------------------------------------------------|
| GhGLR4.8 | RRWER.....LVQGLMG.....RGLWV                                    |
| GluA2    | KSRAEAKR.....MKVAKNAQN.....INPSS                               |
| ATGLR1.1 | EVSRLCTK.....LQSFYK.....                                       |
| ATGLR1.2 | ERWEILVNS.....VNIYFSQRLRHFRILFTR.....TIHPS                     |
| ATGLR1.3 | DKWEILVD.....NLDLSQRLRHFRHFVR.....SIHTS                        |
| ATGLR1.4 | EQRQVVLK.....HFHRYVSHRFAR.....EIRPS                            |
| ATGLR2.1 | EN.....PNQRNLRVLWEKFN.....EPDQKS                               |
| ATGLR2.2 | KT.....KGDLDWKEFL.....KRDTDS                                   |
| ATGLR2.3 | K.....DQVS                                                     |
| ATGLR2.4 | QNRILND.....EFYRGKRMKEMWLKFM.....ESDGES                        |
| ATGLR2.5 | QERQHN.....ASPMLNDQ.....ANAAQE                                 |
| ATGLR2.6 | ROESKSGEINANNSPDTGNMRAPPNQPTDDNMRAPTSPPIDQVLEPPGALNEADDQDQ     |
| ATGLR2.7 | EKHHTLFD.....DSENSFRGKLLKFLVRNFDEKDIKSHMPKENAVHNVSSPITQSSSP    |
| ATGLR2.8 | ENRHTLCD.....DSEDSIWRKLTSLFRNFDEKDIKSHMPKSSAVHHVSSPMTQYIPSPS   |
| ATGLR2.9 | EHRHTLGD.....DSEDSLWRKLLKFLKIFDEKDMNSHTFKNSAIHNISLPMAVYCTWLMIR |
| ATGLR3.1 | DFCKDTP.....EUVVEEAIPS...PK.....SSRLTK                         |
| ATGLR3.2 | DFFRHG.....KYDEEATVPS...PE.....SSRSKS                          |
| ATGLR3.3 | QLYKKPT.....DDAIARDQQNHDS.....SMRSTR                           |
| ATGLR3.4 | QYQRLLP.....ESADEERAGEVSEPSRSG.....RGSRAP                      |
| ATGLR3.5 | QYQRLRP.....EESDEVQARSEAGSSRG.....KSLRAVS                      |
| ATGLR3.6 | QFGQQCP.....EEAEGSIRRR.....SSPSAR                              |
| ATGLR3.7 | QFVRYRR.....MERTSSMPRASWSASP.....TLRLREL                       |

|          | 610                                                   | 620 | 630 | 640 |
|----------|-------------------------------------------------------|-----|-----|-----|
| GhGLR4.8 | WLTTLFSRDQRGNQLQVQLARISFTSQTQLTSS.....                |     |     |     |
| GluA2    | SQNSQNFATYKEGYNVYGIESVKI.....                         |     |     |     |
| ATGLR1.1 | .....                                                 |     |     |     |
| ATGLR1.2 | PLGLDNPIGENAVQMAQRNRR.....                            |     |     |     |
| ATGLR1.3 | PL..DDPIGETAVQMAQQNRQ.....                            |     |     |     |
| ATGLR1.4 | PT..TPNRQNEANSVI.....                                 |     |     |     |
| ATGLR2.1 | YIKDVTKQCQSSGQMPKNGQEGAN.....AVNNGN.....              |     |     |     |
| ATGLR2.2 | YINDIEKCLCSQEMPENSNAKATNQTYGMELVRNIVQVNTDPDCL.....    |     |     |     |
| ATGLR2.3 | YLDKVMSPCQSSSQMPVKKRKTQLN.....MSQVHDQDSL.....         |     |     |     |
| ATGLR2.4 | YIS...RVRSTCPQVLIQPREEDID.....PING.....               |     |     |     |
| ATGLR2.5 | EVNEEGNVG...DHIVEVDTALVRRK..KLTSNTIPIRRVAPLSRLKSA.    |     |     |     |
| ATGLR2.6 | LLNDEVNVGDRNEVDIIVEVDPTLVHRRN.LITSKTIPTRRALFSRIKSA.   |     |     |     |
| ATGLR2.7 | TDQSTPLPRSPEQYRELELRVSSISSGELFTTQ.SEQVEDEESAIQCEGE    |     |     |     |
| ATGLR2.8 | TLQIAPRPHSPSQDRAFELRRVSFTPNNEERLTTQ.TIHFEDEESDIECVVEQ |     |     |     |
| ATGLR2.9 | TVQITPWPQSPSQNREFELRRVSFSPSEERFTTQPIIHHEDEESDIECRVEQ  |     |     |     |
| ATGLR3.1 | LQTFLLAFVDEKEEETKRRLLKRRRNNHDSMNANSIISRTASRRPI.....   |     |     |     |
| ATGLR3.2 | LQTFLLAFVDEKEEESKRRMRRRNNDDLSLKPS.....RPI.....        |     |     |     |
| ATGLR3.3 | LQRFLSLMDEKEESKHESSKRRKIDGSMNDTSGSTRSRGDFRERSFNVPDLD  |     |     |     |
| ATGLR3.4 | FKELIKVVDKREAEIKEILKQKSSKLLKSTQSAAGTSQSQHGEIT.....    |     |     |     |
| ATGLR3.5 | FKDLIKVVDKREAEIKEMLKEKSSKLLKDGQSSAENSQSKDHETPQ.....   |     |     |     |
| ATGLR3.6 | IHDFLSFVKEKEEDAKARSSRERQLEDISANGSSRCN.....            |     |     |     |
| ATGLR3.7 | VDFDFVEFVDEKEEAIKRMFRSDDSNPNP SHVGEVQADTEVPRN.....    |     |     |     |

**Supplementary Figure 7.** Amino acid sequence alignment of GhGLR4.8 with AtGLRs and GluA2. SNP1-SNP4 are marked by red arrow, S1 segment of LBD is indicated by red line, S2 segment of LBD is indicated by green line, the conserved 'SYTASLTS' motif of M3 is indicated by orange line, and the number indicates the amino acid length of GhGLR4.8. The amino acid sequence from top to bottom is GhGLR4.8, GluA2 and *Arabidopsis* 20 AtGLRs.

## Supplementary Figure 8

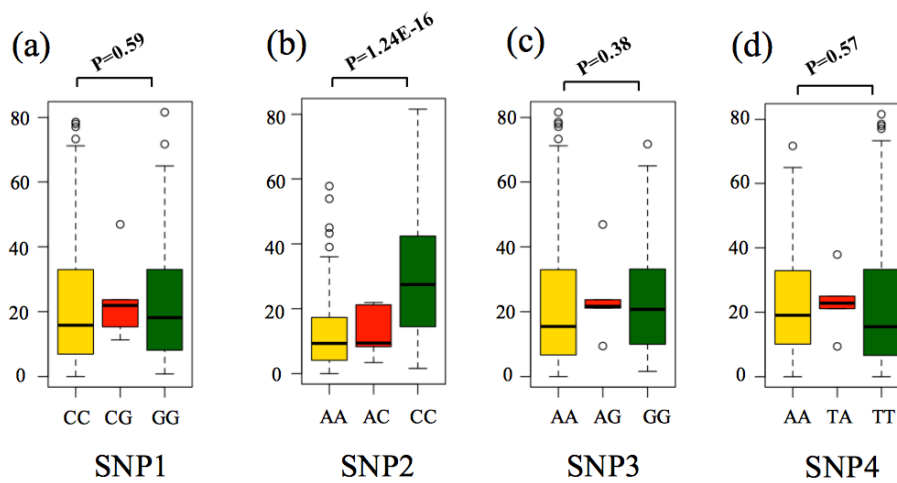

**Supplementary Figure 8.** Association analysis between FW resistance and four nucleotide variations in the *GhGLR4.8* coding sequence. **(a), (c) and (d)** Other three polymorphisms in *GhGLR4.8* are not associated with disease index. In box plots, center line indicates median, box limits denote upper and lower quartiles, and points indicate outliers. Statistical significance was determined by a two-sided *t*-test. **(b)** The disease index shows significant difference between allele 'AA' and allele 'CC' of the strongest association SNP (D03\_2176763).

### Supplementary Figure 9

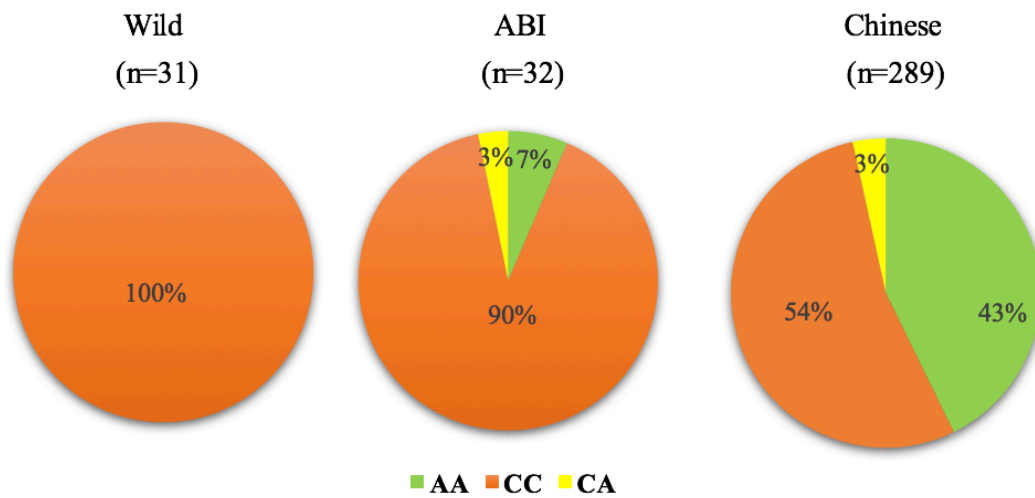

**Supplementary Figure 9.** Genotype frequency distribution of SNP D03\_2176763. The SNP information of 352 resequenced accessions is derived from our previous study.<sup>[12]</sup> Wild group, wild cottons; ABI group, cottons from America, Brazil and India; Chinese group, cottons from China.



**Supplementary Figure 10**

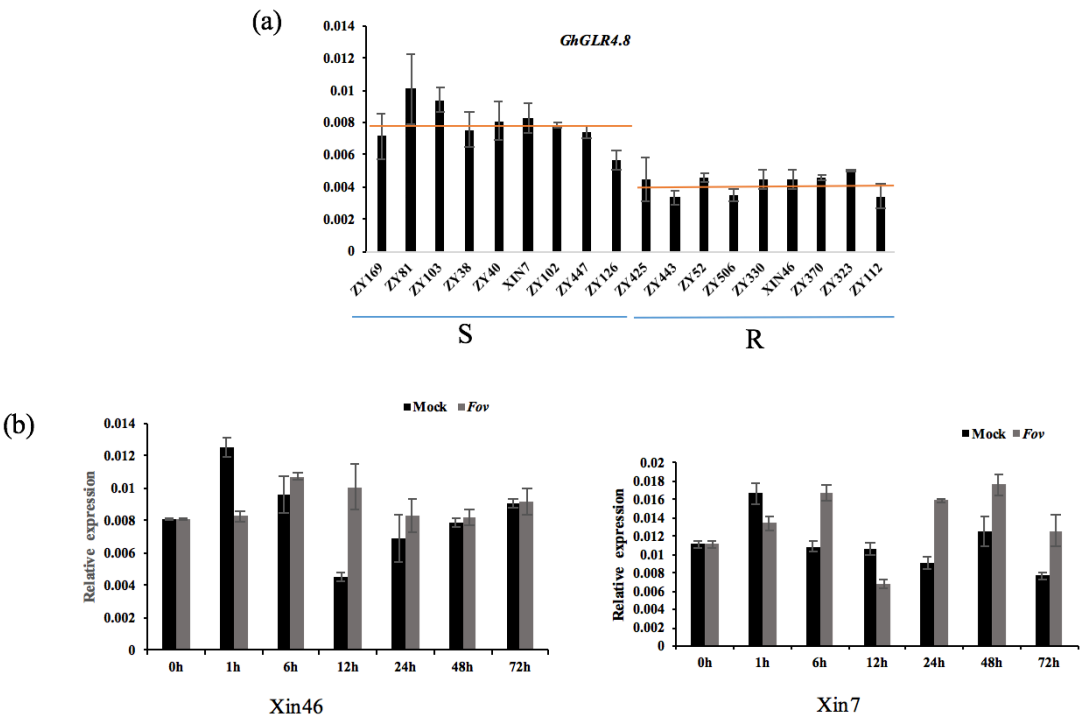

**Supplementary Figure 10.** The expression pattern of *GhGLR4.8* gene. **(a)** qRT-PCR analysis of the expression levels of *GhGLR4.8* in resistance (R) and susceptible (S) cotton varieties **(b)** qRT-PCR analysis of the expression levels of *GhGLR4.8* in resistant and susceptible cotton varieties at different time points after inoculation. The expression level of genes was normalized by the expression of *G. hirsutum* *UB7*, data are presented as mean  $\pm$  SD from three technical replicates.

## Supplementary Figure 11

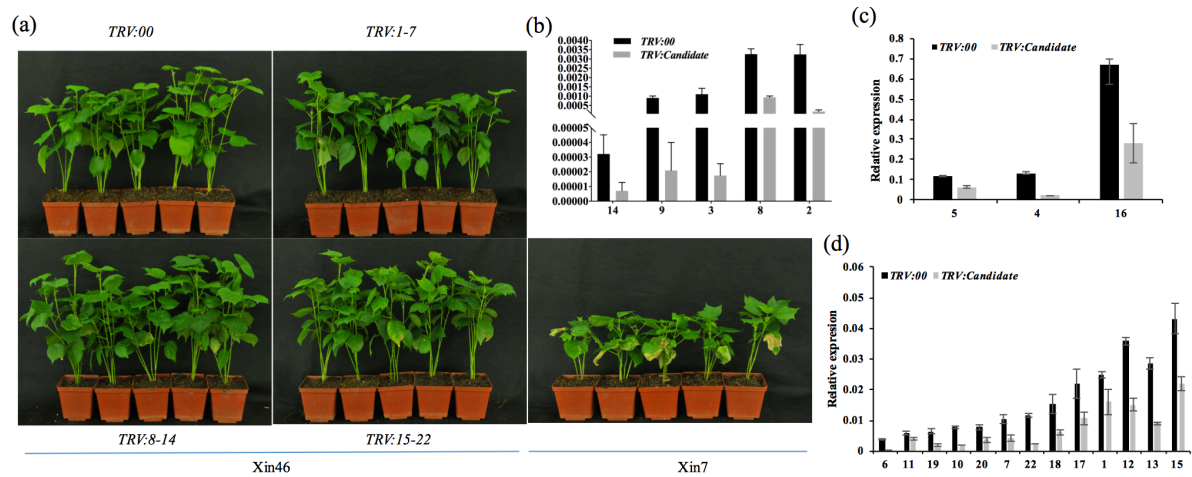

**Supplementary Figure 11.** Knockdown of candidate genes through VIGS except for *GhGLR4.8* has no effect on FW resistance. (a) Phenotype of *TRV:00* plants and genes-silenced plants at 20 days after inoculation with *Fov*. VIGS assay was conducted in a resistant cultivar Xinluzao 46 (Xin46) background. Susceptible cultivar Xinluzao 7 (Xin7) was inoculated with *Fov* simultaneously. (b-d) Detection of genes silencing efficiency through qRT-PCR. Data in b, c and d are presented as mean  $\pm$  SD from three technical replicates.

## Supplementary Figure 12

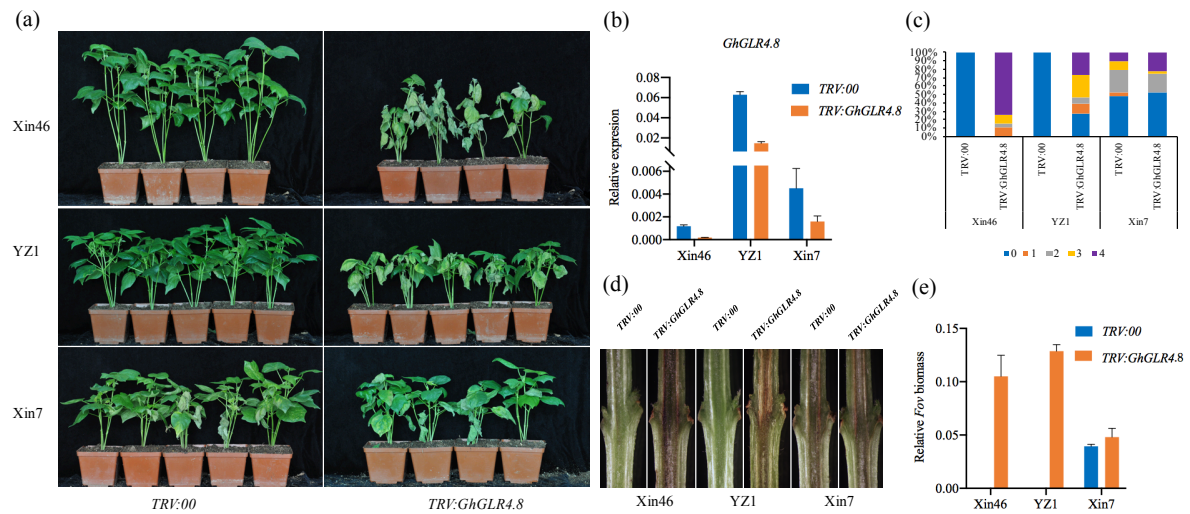

**Supplementary Figure 12.** Knockdown of *GhGLR4.8* strongly suppressed resistance to *Fov* in Upland cotton. **(a)** Disease symptoms of *TRV:00* and *TRV:GhGLR4.8* plants at 20 days after inoculation with *Fov*. Two highly resistant cultivars (Xin46 and YZ1) and one susceptible cultivars (Xin7) were selected. **(b)** Expression levels of *GhGLR4.8* in *TRV:00* and *TRV:GhGLR4.8* plants was determined by qRT-PCR. **(c)** Distribution of disease grade of *TRV:00* and *TRV:GhGLR4.8* plants. **(d)** Vascular bundles coloration in longitudinal-sections of inoculated *TRV:00* and *TRV:GhGLR4.8* plants. **(e)** Relative content of *Fov* DNA in inoculated stem of *TRV:00* and *TRV:GhGLR4.8* plants. Data in b and e are presented as mean  $\pm$  SD from three technical replicates.

## Supplementary Figure 13

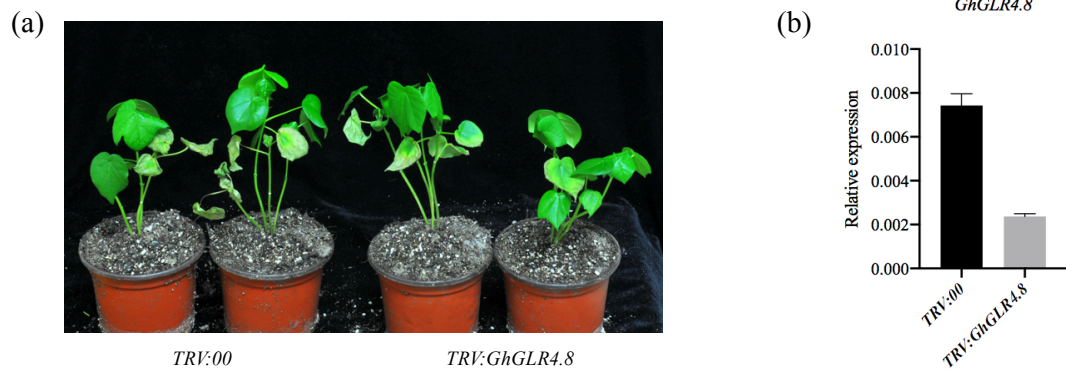

**Supplementary Figure 13.** Knockdown of *GhGLR4.8* through VIGS has no effect on Verticillium wilt resistance. **(a)** Disease symptoms of *TRV:00* and *TRV:GhGLR4.8* plants at 20 days after inoculation with *V. dahliae*. **(b)** Expression levels of *GhGLR4.8* in *TRV:00* and *TRV:GhGLR4.8* plants were determined by qRT-PCR. Data in b are presented as mean  $\pm$  SD from three technical replicates.

## Supplementary Figure 14

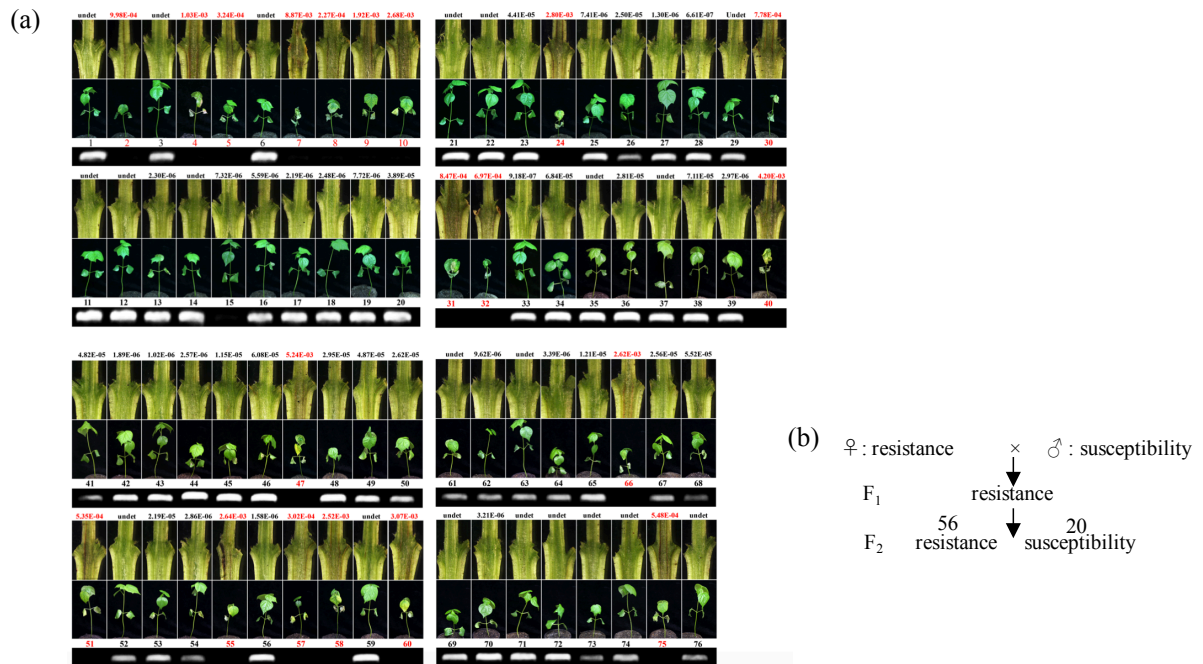

Supplementary Figure 14. Repeat of co-segregation analysis between *GhGLR4.8*<sup>SNP(A/C)</sup> genetic marker and *Fov* resistance. The detailed description refers to Figure 3.

## Supplementary Figure 15

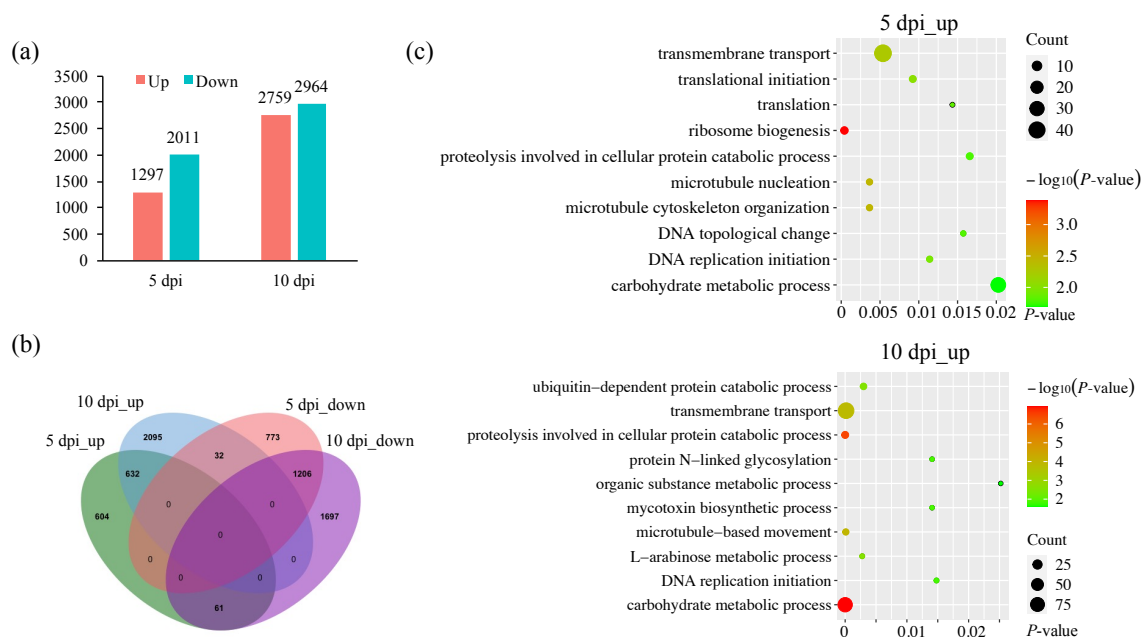

**Supplementary Figure 15.** Transcriptome profile of fungal genes in hypocotyls of *Fov*-infected *Fov7\_KO#5* versus *in vitro*-grown *Fov*. **(a)** The number of differentially expressed fungal genes (DEFGs) ( $P < 0.05$ ,  $|\log_2(\text{FC})| > 1$ ). Fold change was calculated by  $(\text{in planta } Fov)/(\text{in vitro-grown } Fov)$ . **(b)** The venn diagram of DEFGs. **(c)** GO enrichment of host-induced genes of *Fov*. TOP10 significantly enriched biological process GO terms are show. Three biological replicates were included for each treatment.

## Supplementary Figure 16

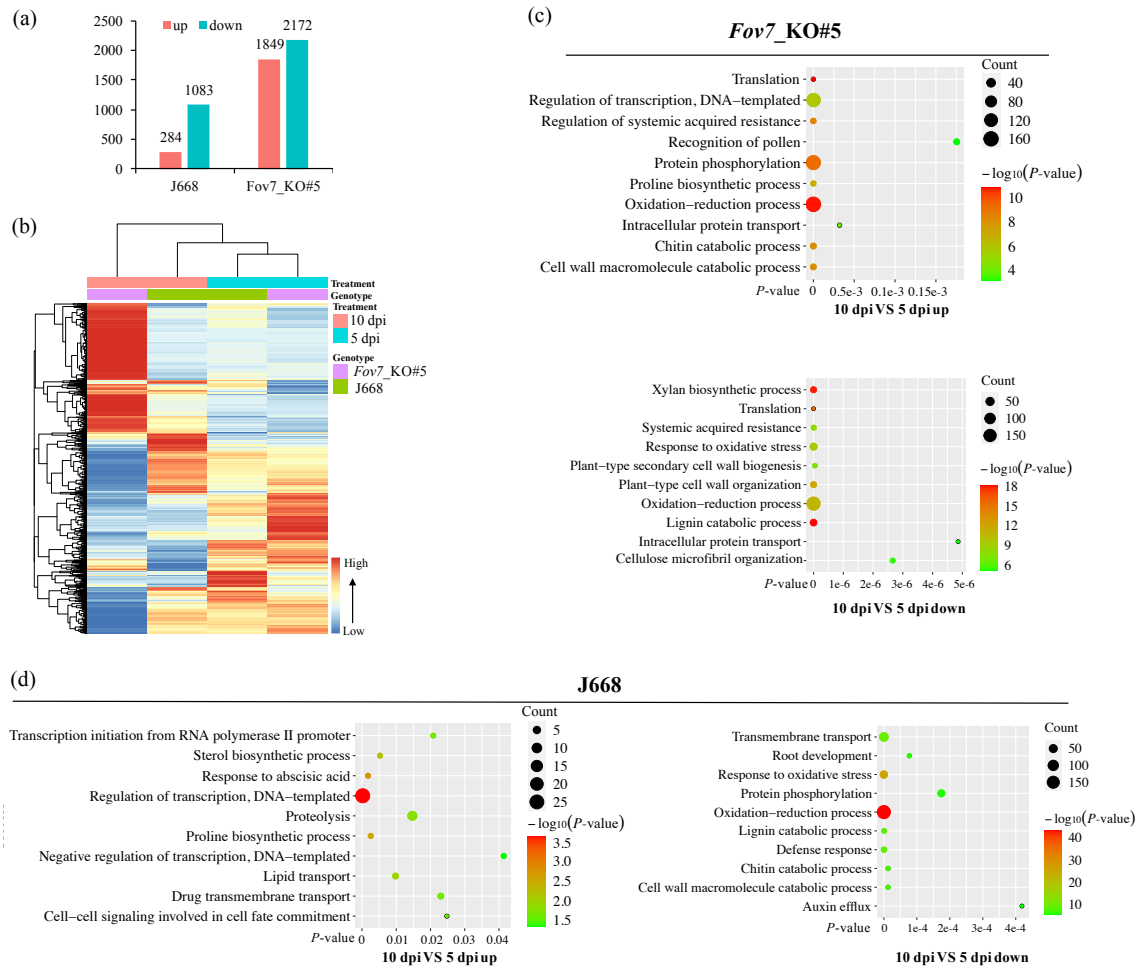

**Supplementary Figure 16.** Transcriptome profile of plant genes in hypocotyls of *Fov*-infected *Fov7\_KO#5* and J668 at 10 dpi versus at 5 dpi. (a) Number of differentially expressed plant genes (DEPGs) ( $P < 0.05$ ,  $|\log_2(\text{FC})| > 2$ ) in *Fov*-infected hypocotyls of *Fov7\_KO#5* and J668 at 10 dpi versus 5 dpi. Fold change is calculated by 10 dpi/5 dpi, dpi, days post inoculation. (b) Heat map of DEPGs in hypocotyls of *Fov7\_KO#5* and J668 at 10 dpi versus 5 dpi. (c) and (d) Gene ontology (GO) enrichment analysis of DEPGs in hypocotyls of *Fov7\_KO#5* (c) or J668 (d) at 10 dpi versus 5 dpi. Three biological replicates were included for each treatment.

# Supplementary Figure 17

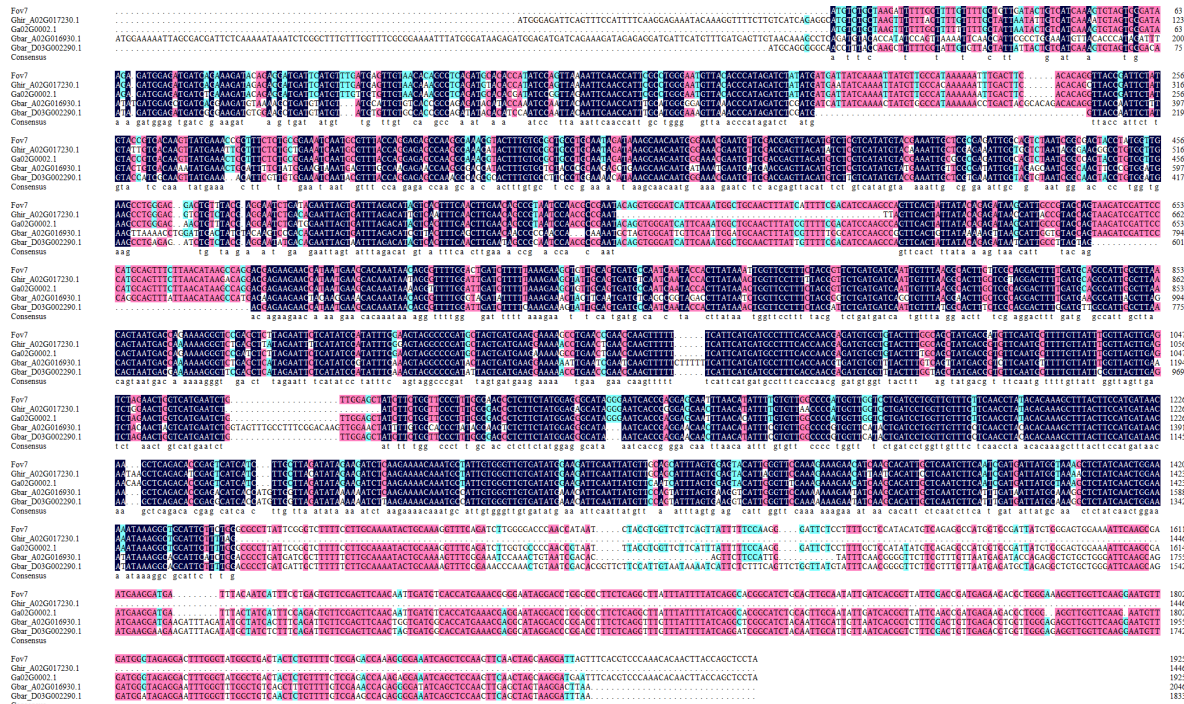

**Supplementary Figure 17.** Sequence comparison of *Fov7* in *G. hirsutum* (TM-1),<sup>[19]</sup> *G. barbadense* (3-79)<sup>[19]</sup> and *G. arboretum* (Shixiyal).<sup>[10]</sup> *Ghir\_A02G017230.1* is the *Fov7* homologue in A subgenome of TM-1, *Ga02G0002.1* is the *Fov7* homologue in Shixiyal, *Gbar\_A02G016930.1* and *Gbar\_D03G002290.1* are the *Fov7* homologues in A and D subgenome of 3-79, respectively.



## Supplementary Table

Supplementary Table 1, 3, 7-10 were offered in a separate file.

**Supplementary Table 1.** The disease index of 290 cotton accessions for GWAS.

**Supplementary Table 2.** The significant SNPs associated with Fusarium wilt.

| SNP          | Chromosome | Allele | Position | <i>P</i> value | $-\log_{10}(P)$ | MarkerR <sup>2</sup> |
|--------------|------------|--------|----------|----------------|-----------------|----------------------|
| D03_2176763  | D03        | G/T    | 2176763  | 7.84E-11       | 10.106          | 0.17535              |
| A01_30018512 | A01        | A/T    | 30018512 | 6.47E-09       | 8.189           | 0.12425              |
| D03_2135880  | D03        | C/T    | 2135880  | 9.11E-09       | 8.040           | 0.13716              |
| D03_2146908  | D03        | G/A    | 2146908  | 1.81E-08       | 7.742           | 0.13175              |
| D03_2115717  | D03        | G/A    | 2115717  | 2.34E-08       | 7.631           | 0.12975              |
| D03_2148731  | D03        | G/A    | 2148731  | 6.76E-08       | 7.170           | 0.12145              |
| D03_2135218  | D03        | A/T    | 2135218  | 7.34E-08       | 7.134           | 0.1208               |
| D03_2115674  | D03        | C/T    | 2115674  | 9.72E-08       | 7.012           | 0.11862              |
| D13_41766280 | D13        | T/G    | 41766280 | 1.35E-07       | 6.869           | 0.11606              |
| D03_2125319  | D03        | A/G    | 2125319  | 1.54E-07       | 6.813           | 0.11506              |
| D03_2076487  | D03        | A/C    | 2076487  | 1.78E-07       | 6.749           | 0.11393              |
| D03_2380413  | D03        | T/G    | 2380413  | 2.04E-07       | 6.691           | 0.11288              |
| D03_2145709  | D03        | G/A    | 2145709  | 2.32E-07       | 6.634           | 0.11187              |
| D03_2147303  | D03        | C/T    | 2147303  | 2.79E-07       | 6.554           | 0.11045              |
| D03_2138339  | D03        | A/G    | 2138339  | 2.99E-07       | 6.524           | 0.10991              |
| D03_2073788  | D03        | G/A    | 2073788  | 3.40E-07       | 6.468           | 0.10893              |
| D03_2075791  | D03        | G/A    | 2075791  | 3.52E-07       | 6.453           | 0.10866              |

**Supplementary Table 3.** The FW resistance of 194 cotton accessions collected from previous study.

**Supplementary Table 4.** Genes located in candidate region of *Fov7* locus and its annotation.

| Gene ID     | Strand | Start   | Stop    | Annotation                                               |
|-------------|--------|---------|---------|----------------------------------------------------------|
| Gh_D03G0203 | -      | 2027606 | 2029122 | heat shock factor 4                                      |
| Gh_D03G0204 | +      | 2045424 | 2045591 | unknown                                                  |
| Gh_D03G0205 | +      | 2094618 | 2094950 | chloride channel B                                       |
| Gh_D03G0206 | -      | 2125102 | 2144777 | cytochrome P450, family 83                               |
| Gh_D03G0207 | -      | 2166718 | 2167364 | Protein of unknown function (DUF1685)                    |
| Gh_D03G0208 | -      | 2169915 | 2173932 | unknown                                                  |
| Gh_D03G0209 | -      | 2175025 | 2177322 | glutamate receptor 3.3                                   |
| Gh_D03G0210 | +      | 2179082 | 2182850 | unknown                                                  |
| Gh_D03G0211 | +      | 2193477 | 2194673 | unknown                                                  |
| Gh_D03G0212 | -      | 2203285 | 2203968 | bHLH DNA-binding superfamily protein                     |
| Gh_D03G0213 | +      | 2218541 | 2219557 | mitogen-activated protein kinase kinase kinase 19        |
| Gh_D03G0214 | +      | 2226884 | 2228258 | F-box/RNI-like superfamily protein                       |
| Gh_D03G0215 | -      | 2229735 | 2231887 | PLC-like phosphodiesterases superfamily protein          |
| Gh_D03G0216 | -      | 2232858 | 2235938 | Plant protein of unknown function (DUF869)               |
| Gh_D03G0217 | -      | 2238291 | 2240938 | protein serine/threonine kinases                         |
| Gh_D03G0218 | -      | 2255453 | 2257785 | Integrase-type DNA-binding superfamily protein           |
| Gh_D03G0219 | +      | 2293920 | 2297367 | Cystathionine beta-synthase (CBS) family protein         |
| Gh_D03G0220 | -      | 2304123 | 2304617 | DREB and EAR motif protein 3                             |
| Gh_D03G0221 | -      | 2314748 | 2317694 | Dentin sialophosphoprotein-related                       |
| Gh_D03G0222 | +      | 2338597 | 2347155 | P-loop containing nucleoside triphosphate hydrolases     |
| Gh_D03G0223 | -      | 2348736 | 2351761 | Leucine-rich receptor-like protein kinase family protein |
| Gh_D03G0224 | +      | 2368534 | 2373145 | 2-oxoglutarate (2OG) and Fe(II)-dependent oxygenase      |
| Gh_D03G0225 | -      | 2373295 | 2374910 | FMN-linked oxidoreductases superfamily protein           |

**Supplementary Table 5.** Features of the *GLR* genes in Upland cotton

| Gene ID         | Gene Name | Chr | Length (aa) | Genomic Region      |
|-----------------|-----------|-----|-------------|---------------------|
| Ghir_A07G021120 | GhGLR1.1  | A07 | 627         | 91819388-91821699   |
| Ghir_A07G021130 | GhGLR1.2  | A07 | 847         | 91850132-91854091   |
| Ghir_D07G009840 | GhGLR1.3  | D07 | 792         | 11852666-11858516   |
| Ghir_D07G021310 | GhGLR1.4  | D07 | 862         | 53661343-53664759   |
| Ghir_D07G021320 | GhGLR1.5  | D07 | 776         | 53666922-53669913   |
| Ghir_A07G003890 | GhGLR2.1  | A07 | 979         | 4330442-4336180     |
| Ghir_D04G008970 | GhGLR2.2  | D04 | 851         | 18628789-18638112   |
| Ghir_D04G015310 | GhGLR2.3  | D04 | 914         | 49556864-49564141   |
| Ghir_D07G003910 | GhGLR2.4  | D07 | 915         | 4037638-4043561     |
| Ghir_A02G019470 | GhGLR3.1  | A02 | 947         | 107934254-107939151 |
| Ghir_A05G018230 | GhGLR3.2  | A05 | 851         | 17246944-17253044   |
| Ghir_A12G001330 | GhGLR3.3  | A12 | 885         | 1683238-1688933     |
| Ghir_A12G016770 | GhGLR3.4  | A12 | 813         | 91878901-91883964   |
| Ghir_A13G006510 | GhGLR3.5  | A13 | 905         | 14068841-14073278   |
| Ghir_A13G009800 | GhGLR3.6  | A13 | 821         | 52745568-52750576   |
| Ghir_A13G009810 | GhGLR3.7  | A13 | 921         | 52799328-52804364   |
| Ghir_D03G000100 | GhGLR3.8  | D03 | 310         | 98496-99510         |
| Ghir_D05G018240 | GhGLR3.9  | D05 | 909         | 15825979-15832082   |
| Ghir_D12G001360 | GhGLR3.10 | D12 | 810         | 1630516-1636164     |
| Ghir_D12G017030 | GhGLR3.11 | D12 | 813         | 49647233-49652268   |
| Ghir_D13G005830 | GhGLR3.12 | D13 | 810         | 7699695-7704665     |
| Ghir_D13G009280 | GhGLR3.13 | D13 | 821         | 19596508-19601650   |
| Ghir_D13G009290 | GhGLR3.14 | D13 | 921         | 19625438-19630396   |
| Ghir_A02G017230 | GhGLR4.1  | A02 | 481         | 105680541-105683016 |
| Ghir_A02G017250 | GhGLR4.2  | A02 | 566         | 105697917-105714265 |

|                 |           |     |     |                   |
|-----------------|-----------|-----|-----|-------------------|
| Ghir_A05G016210 | GhGLR4.3  | A05 | 900 | 15273260-15279087 |
| Ghir_A05G020820 | GhGLR4.4  | A05 | 405 | 20134953-20137186 |
| Ghir_A10G002660 | GhGLR4.5  | A10 | 904 | 2350198-2354896   |
| Ghir_A10G002670 | GhGLR4.6  | A10 | 972 | 2354914-2358484   |
| Ghir_A10G002680 | GhGLR4.7  | A10 | 889 | 2361358-2365538   |
| Ghir_D03G002390 | GhGLR4.8  | D03 | 641 | 2246112-2248669   |
| Ghir_D05G016050 | GhGLR4.9  | D05 | 818 | 13966076-13971543 |
| Ghir_D05G020760 | GhGLR4.10 | D05 | 740 | 18081772-18085238 |
| Ghir_D10G003440 | GhGLR4.11 | D10 | 904 | 2872905-2876333   |
| Ghir_D10G003450 | GhGLR4.12 | D10 | 932 | 2877535-2881153   |
| Ghir_D10G003460 | GhGLR4.13 | D10 | 897 | 2882280-2888831   |

**Supplementary Table 6.** Percentage and number of unique RNA-seq reads aligned to *Fov* race 4.

|            |                  | Days Post Inoculation    |       |                  |        |
|------------|------------------|--------------------------|-------|------------------|--------|
|            |                  | 5                        | 10    | 5                | 10     |
|            |                  | Number of                |       |                  |        |
| Biological |                  | Percentage of <i>Fov</i> |       | Uniquely Aligned |        |
| Replicate  | Plant            | Reads                    |       | Reads            |        |
| 1          | <i>Fov7_KO#5</i> | 0.10%                    | 0.70% | 17429            | 315378 |
| 2          | <i>Fov7_KO#5</i> | 0.09%                    | 0.69% | 31558            | 201704 |
| 3          | <i>Fov7_KO#5</i> | 0.06%                    | 0.66% | 13410            | 193339 |
| Average    |                  | 0.08%                    | 0.68% | 20799            | 236807 |

**Supplementary Table 7.** Transcriptome profiles of fungal genes in hypocotyls of *Fov*-infected *Fov7\_KO#5* versus *in vitro*-grown *Fov*, related to Figure S15.

**Supplementary table 8.** Transcriptome profiles of plant genes in hypocotyls of *Fov*-infected *Fov7\_KO#5* versus J668 at 5 dpi and 10 dpi, related to Figure 5.

**Supplementary table 9.** Transcriptome profiles of plant genes in hypocotyls of *Fov*-infected *Fov7\_KO#5* and J668 at 10 dpi versus 5 dpi, related to Figure S16.

**Supplementary Table 10.** Primers used in this study.
